# Supplementary material for: Management of Pulmonary Nodules by Community Pulmonologists: A Multicenter Observational Study
Source: PubMed Central journal article supplement — Chest. 2015 Jun 18;148(6):1405–14. doi: 10.1378/chest.15-0630 (PMC4665735; doi:10.1378/chest.15-0630), 2015-06-18
Supplement: chest_148_6_1405_ds01.pdf [file chest_148_6_1405_ds01.pdf]

# Management of Pulmonary Nodules by Community Pulmonologists

## A Multicenter Observational Study

Nichole T. Tanner, MD, MSCR; Jyoti Aggarwal, MHS; Michael K. Gould, MD; Paul Kearney, PhD; Gregory Diette, MD, MHS; Anil Vachani, MD; Kenneth C. Fang, MD; and Gerard A. Silvestri, MD

CHEST 2015; 148(6):1405–1414

**e-Figure 1:** PET Interpretation Algorithm

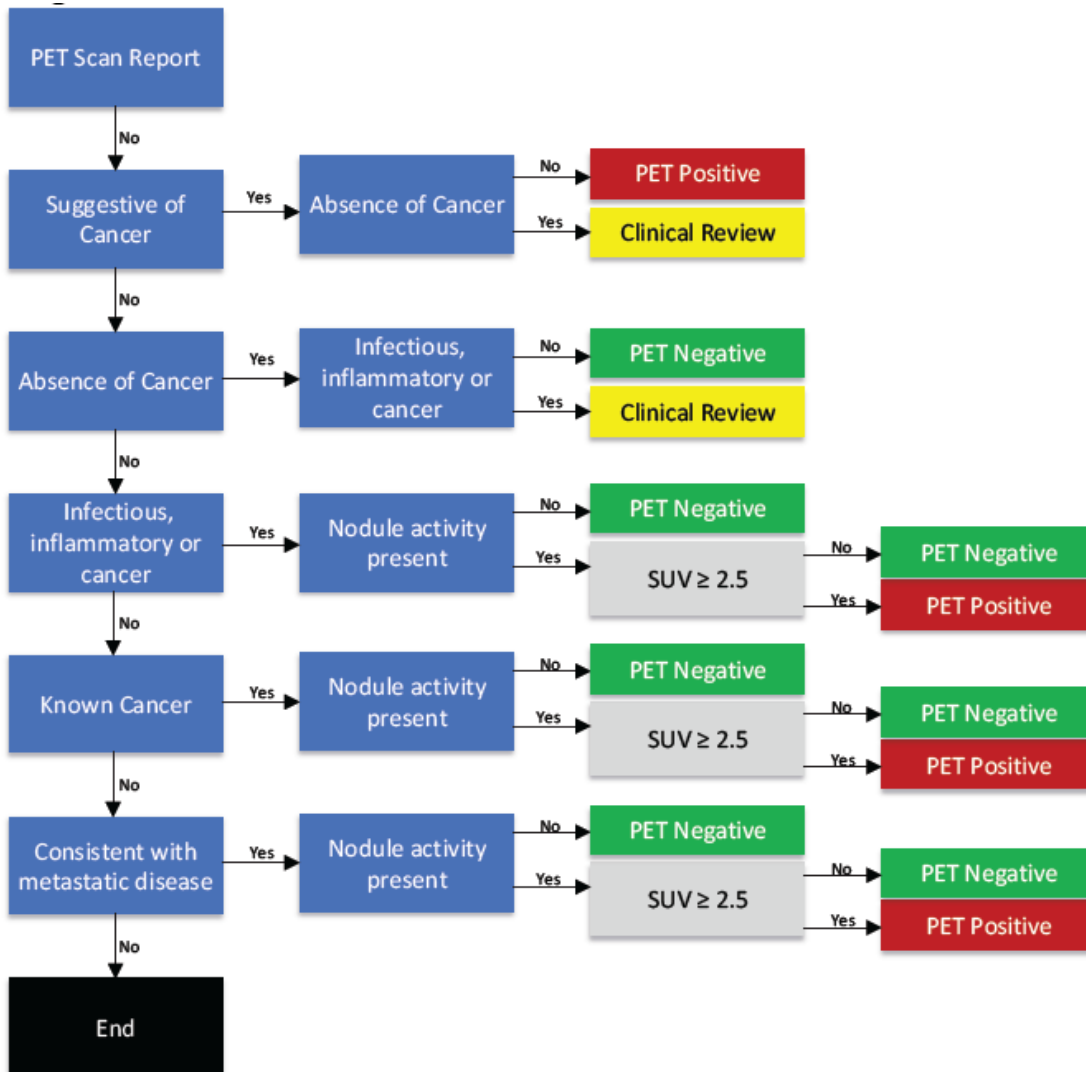

Online supplements are not copyedited prior to posting.

**e-Figure 2:** Geographic Distribution of Participating Pulmonary Clinics

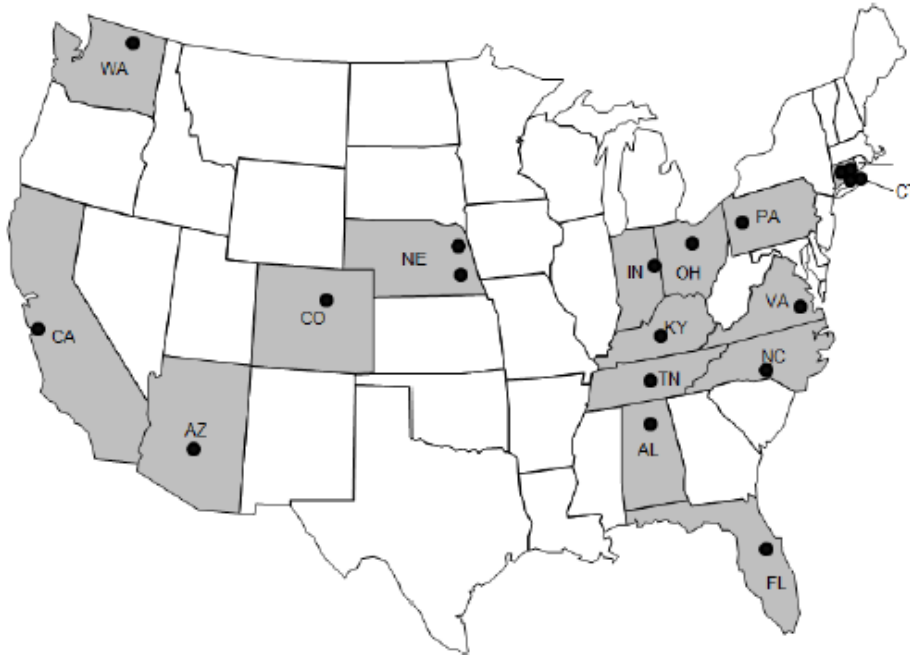

**e-Figure 3:** Model Receiver Operating Characteristic Curve Accuracy

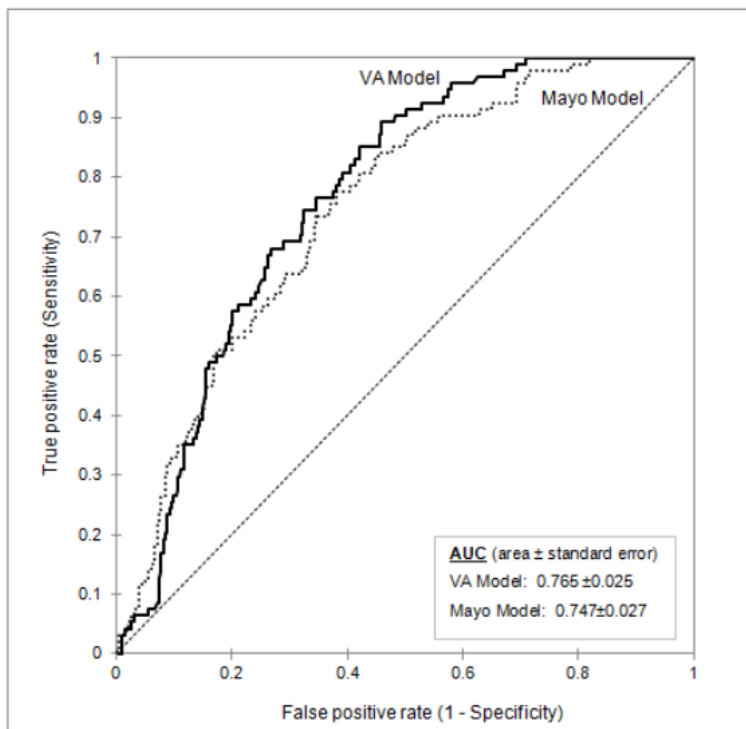

*Online supplements are not copyedited prior to posting.*

**e-Table 1: Proportion of total screened patients excluded due to missing data by site**

| Site # | Total Patients Screened | N (%) Charts Included | N (%) with Missing Data | N (%) with Insufficient Follow-up |
|--------|-------------------------|-----------------------|-------------------------|-----------------------------------|
| 1      | 90                      | 42 (46.67%)           | 0 (0%)                  | 0 (0%)                            |
| 2      | 16                      | 2 (12.50%)            | 10 (62.50%)             | 8 (50.00%)                        |
| 3      | 163                     | 6 (3.68%)             | 7 (4.29%)               | 7 (4.29%)                         |
| 4      | 35                      | 4 (11.43%)            | 5 (14.29%)              | 2 (5.71%)                         |
| 5      | 179                     | 33 (18.44%)           | 27 (15.08%)             | 25 (13.97%)                       |
| 6      | 47                      | 10 (21.28%)           | 12 (25.53%)             | 12 (25.53%)                       |
| 7      | 137                     | 58 (42.34%)           | 13 (9.49%)              | 13 (9.49%)                        |
| 8      | 338                     | 60 (17.75%)           | 74 (21.89%)             | 10 (2.96%)                        |
| 9      | 40                      | 19 (47.50%)           | 10 (25.00%)             | 9 (22.50%)                        |
| 10     | 75                      | 11 (14.67%)           | 16 (21.33%)             | 7 (9.33%)                         |
| 11     | 151                     | 12 (7.95%)            | 18 (11.92%)             | 18 (11.92%)                       |
| 12     | 260                     | 39 (15.00%)           | 46 (17.69%)             | 44 (16.92%)                       |
| 13     | 64                      | 17 (26.56%)           | 7 (10.94%)              | 6 (9.38%)                         |
| 14     | 382                     | 27 (7.07%)            | 53 (13.87%)             | 53 (13.87%)                       |
| 15     | 47                      | 7 (14.89%)            | 4 (8.51%)               | 0 (0%)                            |
| 16     | 116                     | 15 (12.93%)           | 9 (7.76%)               | 8 (6.90%)                         |
| 17     | 20                      | 8 (40.00%)            | 4 (20.00%)              | 4 (20.00%)                        |
| 18     | 419                     | 7 (1.67%)             | 109 (26.01%)            | 77 (18.38%)                       |

**e-Table 2: Proportion of total screened patients excluded due to missing data by region**

| Region    | Total Patients Screened | N (%) Charts Included | N (%) with Missing Data | N (%) with Insufficient Follow-up |
|-----------|-------------------------|-----------------------|-------------------------|-----------------------------------|
| Midwest   | 693                     | 118 (17.03%)          | 140 (20.20%)            | 65 (9.38%)                        |
| Northeast | 411                     | 88 (21.41%)           | 31 (7.54%)              | 26 (6.33%)                        |
| South     | 810                     | 88 (10.86%)           | 125 (15.43%)            | 118 (14.57%)                      |
| West      | 665                     | 83 (12.48%)           | 128 (19.25%)            | 94 (14.14%)                       |

*Online supplements are not copyedited prior to posting.*

**e-Table 3: Calculated Pre-Test Probability and Procedure Utilization (Mayo Model)**

|                                 | < 0.05<br>n=32 | 0.05 to < 0.65<br>n=316 | ≥ 0.65<br>n=29 | p-value |
|---------------------------------|----------------|-------------------------|----------------|---------|
| Mayo Model pCA                  | 0.03 ± 0.010   | 0.26 ± 0.161            | 0.76 ± 0.073   |         |
| Outcome                         |                |                         |                |         |
| Benign (n,%)                    | 32 , 100%      | 235 , 74%               | 16 , 55%       | 0.0002  |
| Malignant (n,%)                 | 0 , 0%         | 81 , 26%                | 13 , 45%       | 0.0002  |
| Age (mean ± SD)                 | 52.3 ± 8.04    | 64.8 ± 10.41            | 73.8 ± 8.32    | <0.0001 |
| Smoking Status                  |                |                         |                |         |
| Ever (n,%)                      | 6 , 19%        | 241 , 76%               | 28 , 97%       | <0.0001 |
| Never (n,%)                     | 26 , 81%       | 75 , 24%                | 1 , 3%         | <0.0001 |
| Years Quit (mean ± SD)          | 0.3 ± 1.94     | 9.5 ± 19.00             | 15.3 ± 21.38   | 0.0050  |
| Pack-Years                      | 6.2 ± 13.75    | 33.2 ± 31.36            | 45.1 ± 33.14   | <0.0001 |
| Nodule Size (mean ± SD)         | 9.1 ± 1.66     | 12.8 ± 3.54             | 16.9 ± 3.60    | <0.0001 |
| History of Cancer (n,%)         | 0 , 0%         | 40 , 13%                | 11 , 38%       | <0.0001 |
| Spiculated (n,%)                | 0 , 0%         | 92 , 29%                | 26 , 90%       | <0.0001 |
| Upper Lobe (n,%)                | 2 , 6%         | 148 , 47%               | 29 , 100%      | <0.0001 |
| Procedure Utilization           |                |                         |                |         |
| Surgery (n,%)                   | 2 , 6%         | 68 , 22%                | 7 , 24%        | 0.1089  |
| Biopsy (n,%)                    | 9 , 28%        | 118 , 37%               | 17 , 59%       | 0.0369  |
| Surgery or Biopsy (n,%)         | 11 , 34%       | 170 , 54%               | 21 , 72%       | 0.0118  |
| PET (n,%)                       | 7 , 22%        | 122 , 39%               | 12 , 41%       | 0.1582  |
| CT/X-Ray Only (n,%)             | 17 , 53%       | 109 , 34%               | 7 , 24%        | 0.0468  |
| Procedure Utilization Category* |                |                         |                |         |
| Most Invasive = Surgery (n,%)   | 2 , 6%         | 68 , 22%                | 7 , 24%        | 0.1089  |
| Most Invasive = Biopsy (n,%)    | 9 , 28%        | 102 , 32%               | 14 , 48%       | 0.1767  |
| Surveillance (n,%)              | 21 , 66%       | 146 , 46%               | 8 , 28%        | 0.0118  |

*Online supplements are not copyedited prior to posting.*
